# Supplementary material for: Nucleoside 5′-Phosphoramidates Control the Phenylpropanoid Pathway in Vitis vinifera Suspension-Cultured Cells
Source: MDPI journal article supplement (doi:10.3390/ijms222413567), 2021-12-17
Supplement: s1 [file s1]

## Nucleoside 5'-phosphoramidates control phenylpropanoid pathway in *Vitis vinifera* suspension-cultured cells

### Methods S2: Identification and determination of phenylamides content

The extracts of freeze dried cells and spent media were subjected to liquid chromatography coupled with tandem mass spectrometry (LC-MS/MS) in the multiple reaction monitoring (MRM) mode for the determination of phenylamide concentrations. Analysis was performed using a Quattro Micro API mass spectrometer (Waters, Milford, MA, USA) connected to an Acquity UPLC system (Waters). The LC conditions were as follows: column: ACQUITY UPLC BEH C18 (2.1 mm ID, 50 mm length, 1.7  $\mu$ m particle size) (Waters); column temperature: 40°C; solvents: 0.1% formic acid in water (A) and 0.1% formic acid in acetonitrile (B); gradient: 5%-70% B/(A + B) within 10 min; flow rate: 0.2 mL/min. The MRM conditions were optimized using authentic compounds previously synthesized [1]. The ion transition, cone voltage and collision energy are summarized in Table 1. A mixture of authentic compounds in methanol at 10  $\mu$ g/mL each were used for generation of standard curves.

1. Morimoto, N.; Ueno, K.; Teraishi, M.; Okumoto, Y.; Mori, N.; Ishihara, A. Induced phenylamide accumulation in response to pathogen infection and hormone treatment in rice (*Oryza sativa*). *Biosci. Biotechnol. Biochem.* **2018**, *82*, 407–416, doi:10.1080/09168451.2018.1429889.

**Table.** MRM conditions for the detection of phenylamides in cultured cells and spent media by liquid chromatography coupled with tandem mass spectrometry.

| Compound* | Precursor ion<br>( <i>m/z</i> ) | Product ion<br>( <i>m/z</i> ) | Cone voltage<br>(V) | Collision<br>energy (eV) |
|-----------|---------------------------------|-------------------------------|---------------------|--------------------------|
| CinAgm    | 261.19                          | 130.92                        | 25.00               | 32.00                    |
| CouAgm    | 277.11                          | 146.89                        | 25.00               | 26.00                    |
| CafAgm    | 293.09                          | 162.83                        | 30.00               | 30.00                    |
| FerAgm    | 307.05                          | 176.89                        | 34.00               | 24.00                    |
| BenAgm    | 265.21                          | 175.93                        | 25.00               | 20.00                    |
| CinTyr    | 268.12                          | 131.00                        | 20.00               | 14.00                    |
| CouTyr    | 284.10                          | 146.87                        | 25.00               | 22.00                    |

|        |        |        |       |       |
|--------|--------|--------|-------|-------|
| CafTyr | 300.09 | 162.82 | 20.00 | 22.00 |
| FerTyr | 313.99 | 176.91 | 28.00 | 18.00 |
| BenTyr | 242.20 | 120.98 | 20.00 | 26.00 |
| CinTyr | 291.16 | 130.92 | 20.00 | 18.00 |
| CouTyr | 307.08 | 146.93 | 20.00 | 22.00 |
| CafTyr | 323.13 | 162.96 | 20.00 | 26.00 |
| FerTyr | 337.04 | 176.90 | 30.00 | 14.00 |
| BenTyr | 265.18 | 143.96 | 20.00 | 18.00 |
| CinSer | 307.14 | 130.91 | 20.00 | 22.00 |
| CouSer | 323.04 | 146.88 | 22.00 | 16.00 |
| CafSer | 338.97 | 176.95 | 22.00 | 12.00 |
| FerSer | 353.03 | 176.89 | 24.00 | 14.00 |
| BenSer | 281.16 | 160.04 | 20.00 | 16.00 |
| FerPut | 265.24 | 176.96 | 20.00 | 18.00 |
| CafPut | 251.19 | 162.97 | 20.00 | 22.00 |
| CouPut | 235.21 | 146.95 | 20.00 | 22.00 |
| CinPut | 219.23 | 102.93 | 20.00 | 34.00 |
| BenPut | 193.20 | 104.90 | 20.00 | 26.00 |

---

Abbreviations: CinAgm: *N*-cinnamoylagmatine; CouAgm: *N-p*-coumaroylagmatine; CafAgm: *N*-caffeoylagmatine; FerAgm: *N*-feruloylagmatine; BenAgm: *N*-benzoylagmatine; CinTyr: *N*-cinnamoyltyramine; CouTyr: *N-p*-coumaroyltyramine; CafTyr: *N*-caffeoyltyramine; FerTyr: *N*-feruloyltyramine; BenTyr: *N*-benzoyltyramine; CinTry: *N*-cinnamoyltryptamine; CouTry: *N-p*-coumaroyltryptamine; CafTry: *N*-caffeoyltryptamine; FerTry: *N*-feruloyltryptamine; BenTry: *N*-benzoyltryptamine; CinSer: *N*-cinnamoylserotonin; CouSer: *N-p*-coumaroylserotonin; CafSer: *N*-caffeoylserotonin; FerSer: *N*-feruloylserotonin; BenSer: *N*-benzoylserotonin; FerPut: *N*-feruloylputrescine; CafPut: *N*-caffeoylputrescine; CouPut: *N-p*-coumaroylputrescine; CinPut: *N*-cinnamoylputrescine; BenPut: *N*-benzoylputrescine
