# Supplementary material for: Nucleoside 5′-Phosphoramidates Control the Phenylpropanoid Pathway in Vitis vinifera Suspension-Cultured Cells
Source: MDPI journal article supplement (doi:10.3390/ijms222413567), 2021-12-17
Supplement: s1 [file s1]

**Table S1.** Primer sequences used for quantitative real-time polymerase chain reaction.

| Gene Symbol                   | GeneBank ID    | Forward Primer (5'-3') | Reverse Primer (5'-3')   | Amplicon Length (bp) |
|-------------------------------|----------------|------------------------|--------------------------|----------------------|
| <i>PAL1</i>                   | XM_002281763.2 | CCGAACCGAATCAAGGACTG   | GTTCCAGCCACTGAGACAATC    | 183                  |
| <i>C4H1</i>                   | XM_002266202.1 | TCCAAGTCACCGAGCCTGAT   | GCAGGAATGTCATAGCCACC     | 109                  |
| <i>4CL1</i>                   | XM_002272746.2 | CTGATGCCGCTGTTGTTTCG   | GCAGGATTTTACCCGATGGA     | 198                  |
| <i>CHS1</i>                   | EC996578.1     | GTCCCAGGGTTGATTTCCAA   | TCTCTTCCTTCAGACCCAGTT    | 157                  |
| <i>STS1</i>                   | XM_002264419.2 | CGCCAGGAGATAATCACTGCT  | GCACCAGGCATTCTACACC      | 134                  |
| <i>CCR2</i>                   | XM_002273418.3 | ACAGCATGACGACTCTCTTCG  | AGTGACAAGGGGTGGATTGA     | 182                  |
| <i>CAD1</i>                   | 100247381      | GGAGGGATGAAGGAGACACA   | CTTTCAGCGTGTTGCCAATG     | 166                  |
| <i>VvABCG44</i>               | AB910387.1     | TAGGAGTGGTTGCAGCTGTG   | TTTGCTCCGTGTGACTTCTT     | 114                  |
| <i>EF<math>\alpha</math>1</i> | XP_002284964.1 | GAACTGGGTGCTTGATAGGC   | AACCAAAATATCCGGAGTAAAAGA | 164                  |
